# Supplementary material for: Ultra-Processed Food Intake and Smoking Interact in Relation with Colorectal Adenomas
Source: MDPI journal article supplement (doi:10.3390/nu12113507), 2020-11-14
Supplement: s1 [file s1]

**Supplementary Materials:** The following are available online at [www.mdpi.com/xxx/s1](http://www.mdpi.com/xxx/s1), **Table A1.** Un-processed and Processed vs. Ultra-processed Food groups, Figure S1. The proportional caloric intake of UPFs in the total diet and within food groups; **Table A2.** The association between high UPF intake ( $\geq 44.8\%$  of total kcal) and lifestyle characteristics; **Table A3.** The adjusted association between high UPF intake from food groups, and colorectal adenoma as compared to controls, stratified by smoking status

**Table 1.** Un-processed and Processed vs. Ultra-processed Food groups.

| Unprocessed and processed               | Ultra-processed                        |
|-----------------------------------------|----------------------------------------|
| Bread, pastries and starch              |                                        |
| White bread                             | Diet bread with fiber                  |
| Black bread                             | Diet white bread                       |
| Whole wheat bread                       | Crackers                               |
| Pitta bread                             | Cornflakes                             |
| Rice pasta                              | Pizza                                  |
| Semolina                                | Burekas                                |
| Baked or boiled potato                  | Malawach                               |
| Snacks                                  |                                        |
|                                         | Chocolate roll cake                    |
|                                         | Busquets and bought cookies            |
|                                         | Waffle                                 |
|                                         | Cookies                                |
| Home-made cake                          | Milk chocolate                         |
| Jam                                     | Chocolate bar                          |
| Dried fruit                             | Chocolate spread                       |
|                                         | Cream ice cream                        |
|                                         | Non-dairy ice cream                    |
|                                         | Energy bar                             |
|                                         | Diet energy bar                        |
|                                         | Salty snacks                           |
|                                         | Potato chips                           |
| Beverages                               |                                        |
| Fresh fruit juice                       | Sugar sweetened beverages              |
| Fresh carrot juice                      | Diet sugar sweetened beverages         |
| Soda water                              | Processed fruit juice                  |
| Green tea                               | Root beer                              |
| Black tea                               | Iced tea                               |
| Water                                   | Flavored water                         |
|                                         | Iced coffee                            |
|                                         | Diet iced tea                          |
| Oils and spreads                        |                                        |
| Olives                                  |                                        |
| Olive oil                               | Margarine                              |
| Canola oil                              | Bought Humus paste                     |
| Soy oil                                 | Bought tachina paste                   |
| Corn oil                                | Bought cabbage carrot mayonnaise salad |
| Sunflower oil                           |                                        |
| Nuts                                    |                                        |
| Dairy                                   |                                        |
| Milk 1-3% fat                           | Milk beverages                         |
| Yogurt unsweetened                      | Sweetened yogurt and dairy products    |
| Cream cheese                            | Diet sweetened yogurt                  |
| Sour cream                              | Chadder and yellow cheese              |
| Butter                                  |                                        |
| Meat poultry fish                       |                                        |
| Beef steak, roast, ground meat products | Processed fried chicken                |
| Internal organs of beef and chicken     | Beef hamburger                         |

| Unprocessed and processed             | Ultra-processed                      |
|---------------------------------------|--------------------------------------|
| Chicken breast or leg cooked or fried | Sausage, cold cuts, pastrami, salami |
| Lamb                                  | Preserved meat                       |
| Pork                                  | Meat substitutes                     |
| Duck                                  |                                      |
| Fresh fish                            |                                      |
| Salted fish                           |                                      |
| Canned tuna or sardines               |                                      |

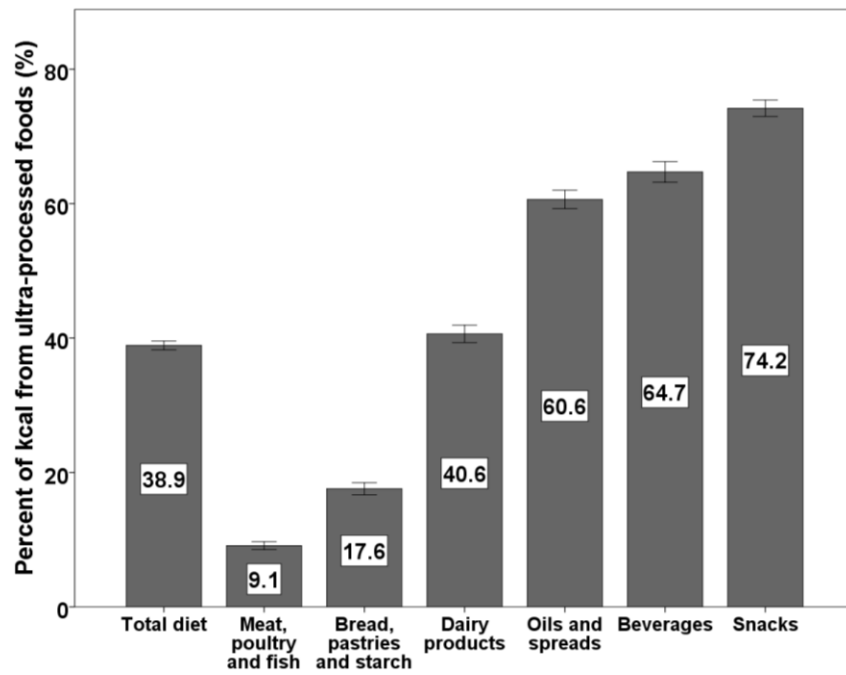

**Figure 1.** The proportional caloric intake of UPFs in the total diet and within food groups within the total study population.

**Table 2.** The association between high UPF intake ( $\geq 44.8\%$  of total kcal) and lifestyle characteristics.

|                                        | UPF intake $\leq 30.41\%$ of total kcal (n=214) | UPF intake 30.42-44.88 of total kcal (n=225) | UPF intake $\geq 44.89\%$ of total kcal (n=213) | P                |
|----------------------------------------|-------------------------------------------------|----------------------------------------------|-------------------------------------------------|------------------|
| Age (years) (mean $\pm$ std)           | 58.8 $\pm$ 6.8                                  | 57.8 $\pm$ 6.4                               | 58.9 $\pm$ 6.7                                  | 0.167            |
| <b>Gender (% male)</b>                 | <b>49.4</b>                                     | <b>45.2</b>                                  | <b>57.7</b>                                     | <b>0.023</b>     |
| Smoking <sup>a</sup> (%)               | 50.2                                            | 51.3                                         | 58.1                                            | 0.180            |
| Obesity <sup>b</sup> (%)               | 27.3                                            | 27.9                                         | 33.9                                            | 0.228            |
| Physical inactivity <sup>c</sup> (%)   | 43.4                                            | 44.5                                         | 44.6                                            | 0.958            |
| Healthy diet index <sup>d</sup> (%)    | 53.7                                            | 45.2                                         | 46.2                                            | 0.136            |
| <b>Caloric intake (Kcal/day)</b>       | <b>1883<math>\pm</math>628</b>                  | <b>2032<math>\pm</math>680</b>               | <b>2218<math>\pm</math>735</b>                  | <b>&lt;0.001</b> |
| <b>Protein (% of total kcal)</b>       | <b>20.0<math>\pm</math>4.6</b>                  | <b>18.2<math>\pm</math>3.9</b>               | <b>16.3<math>\pm</math>4.1</b>                  | <b>&lt;0.001</b> |
| Fat (% of total kcal)                  | 36.6 $\pm$ 6.6                                  | 35.8 $\pm$ 6.0                               | 36.3 $\pm$ 7.0                                  | 0.427            |
| <b>SFA (% of total kcal)</b>           | <b>12.1<math>\pm</math>3.5</b>                  | <b>12.7<math>\pm</math>4.1</b>               | <b>12.3<math>\pm</math>3.6</b>                  | <b>0.046</b>     |
| <b>Carbohydrates (% of total kcal)</b> | <b>39.4<math>\pm</math>8.4</b>                  | <b>42.3<math>\pm</math>7.8</b>               | <b>44.1<math>\pm</math>9.2</b>                  | <b>&lt;0.001</b> |
| Fiber (gr/day)                         | 22.4 $\pm$ 10.6                                 | 24.2 $\pm$ 13.0                              | 23.4 $\pm$ 11.9                                 | 0.260            |
| Sodium (mg/day)                        | 2745 $\pm$ 1027                                 | 2750 $\pm$ 979                               | 2842 $\pm$ 1053                                 | 0.516            |
| Aspirin use (%)                        | 23.8                                            | 27.0                                         | 31.2                                            | 0.200            |

<sup>a</sup> Smoking is defined as ever (past/present) smoking; <sup>b</sup> Obesity is defined as BMI $>30$  kg/m<sup>2</sup>; <sup>c</sup> Physical inactivity – Reported no intentional exercise or less than 20 min/ week of exercise which leads to increased heart rate and/or sweating; <sup>d</sup> A healthy dietary index was defined if participants reported consuming at least five of the American Heart Association (AHA) healthy diet components.

**Table 3.** The adjusted association between high UPF intake from food groups, and colorectal adenoma as compared to controls, stratified by smoking status.

|                                                               | Total study population          |                               | Never smokers                   |                        | Smokers                         |                               |
|---------------------------------------------------------------|---------------------------------|-------------------------------|---------------------------------|------------------------|---------------------------------|-------------------------------|
|                                                               | Cases (n=294)/ Controls (n=358) | OR (95%CI) P                  | Cases (n=121)/ Controls (n=194) | OR (95%CI) P           | Cases (n=173)/ Controls (n=164) | OR (95%CI) P                  |
| <b>Bread, pastries and starch</b>                             |                                 |                               |                                 |                        |                                 |                               |
| 1 <sup>st</sup> tertile ( $\leq 2.03\%$ UPF kcal/group kcal)  | 98/117                          | Ref.                          | 36/59                           | Ref.                   | 62/58                           | Ref.                          |
| 2 <sup>nd</sup> tertile (2.04-19.73% UPF kcal/group kcal)     | 102/121                         | 1.00 (0.66-1.52) 0.976        | 47/72                           | 1.21 (0.66-2.21) 0.522 | 55/49                           | 0.85 (0.46-1.55) 0.604        |
| 3 <sup>rd</sup> tertile ( $\geq 19.74\%$ UPF kcal/group kcal) | 94/120                          | 1.05 (0.69-1.60) 0.799        | 38/63                           | 1.13 (0.61-2.11) 0.687 | 56/57                           | 0.99 (0.55-1.78) 0.978        |
| <b>Snacks</b>                                                 |                                 |                               |                                 |                        |                                 |                               |
| 1 <sup>st</sup> tertile ( $\leq 71.37\%$ UPF kcal/group kcal) | 86/120                          | Ref.                          | 38/60                           | Ref.                   | 48/60                           | Ref.                          |
| 2 <sup>nd</sup> tertile (71.38-94.90% UPF kcal/group kcal)    | 98/142                          | 0.99 (0.65-1.52) 0.998        | 42/85                           | 0.86 (0.47-1.55) 0.626 | 56/57                           | 1.19 (0.64-2.23) 0.575        |
| 3 <sup>rd</sup> tertile ( $\geq 94.91\%$ UPF kcal/group kcal) | 110/96                          | <b>1.63 (1.06-2.49) 0.023</b> | 41/49                           | 1.29 (0.68-2.42) 0.425 | 69/47                           | <b>2.08 (1.15-3.77) 0.015</b> |
| <b>Beverages</b>                                              |                                 |                               |                                 |                        |                                 |                               |
| 1 <sup>st</sup> tertile                                       | 84/131                          | Ref.                          | 35/77                           | Ref.                   | 49/54                           | Ref.                          |

|                                                            | Total study population          |                                             | Never smokers                   |                                         | Smokers                         |                                         |
|------------------------------------------------------------|---------------------------------|---------------------------------------------|---------------------------------|-----------------------------------------|---------------------------------|-----------------------------------------|
|                                                            | Cases (n=294)/ Controls (n=358) | OR (95%CI) P                                | Cases (n=121)/ Controls (n=194) | OR (95%CI) P                            | Cases (n=173)/ Controls (n=164) | OR (95%CI) P                            |
| (≤50.0% UPF kcal/group kcal)                               |                                 |                                             |                                 |                                         |                                 |                                         |
| 2 <sup>nd</sup> tertile (50.01-95.83% UPF kcal/group kcal) | 111/124                         | 1.26 (0.82-1.94)<br>0.274                   | 48/69                           | 1.26 (0.68-2.31)<br>0.454               | 63/55                           | 1.33 (0.71-2.52)<br>0.366               |
| 3 <sup>rd</sup> tertile (≥95.84% UPF kcal/group kcal)      | 99/103                          | 1.34 (0.88-2.05)<br>0.164                   | 38/48                           | 1.54 (0.82-2.89)<br>0.172               | 61/55                           | 1.14 (0.64-2.05)<br>0.638               |
| <b>Oils and spreads</b>                                    |                                 |                                             |                                 |                                         |                                 |                                         |
| 1 <sup>st</sup> tertile (≤49.51% UPF kcal/group kcal)      | 81/142                          | Ref.                                        | 36/82                           | Ref.                                    | 45/60                           | Ref.                                    |
| 2 <sup>nd</sup> tertile (49.52-85.22% UPF kcal/group kcal) | 104/126                         | 1.40 (0.92-2.13)<br>0.108                   | 38/66                           | 1.25 (0.68-2.30)<br>0.468               | 66/60                           | 1.52 (0.84-2.74)<br>0.161               |
| 3 <sup>rd</sup> tertile (≥85.23% UPF kcal/group kcal)      | 109/90                          | <b>2.20 (1.42-3.40)</b><br><b>&lt;0.001</b> | 47/46                           | <b>2.49 (1.33-4.64)</b><br><b>0.004</b> | 62/44                           | <b>2.99 (1.07-3.71)</b><br><b>0.029</b> |
| <b>Dairy</b>                                               |                                 |                                             |                                 |                                         |                                 |                                         |
| 1 <sup>st</sup> tertile (≤17.94% UPF kcal/group kcal)      | 79/133                          | Ref.                                        | 35/66                           | Ref.                                    | 44/67                           | Ref.                                    |
| 2 <sup>nd</sup> tertile (17.95-53.23% UPF kcal/group kcal) | 107/127                         | <b>1.61 (1.06-2.46)</b><br><b>0.025</b>     | 47/75                           | 1.48 (0.81-2.70)<br>0.195               | 60/52                           | 1.79 (0.98-3.27)<br>0.056               |
| 3 <sup>rd</sup> tertile (≥53.24% UPF kcal/group kcal)      | 108/98                          | <b>1.92 (1.26-2.93)</b><br><b>0.002</b>     | 39/53                           | 1.47 (0.79-2.75)<br>0.219               | 69/45                           | <b>2.44 (1.36-4.36)</b><br><b>0.003</b> |
| <b>Meat, poultry and fish</b>                              |                                 |                                             |                                 |                                         |                                 |                                         |
| 1 <sup>st</sup> tertile (≤0.78% UPF kcal/group kcal)       | 95/137                          | Ref.                                        | 47/75                           | Ref.                                    | 48/62                           | Ref.                                    |
| 2 <sup>nd</sup> tertile (0.79-8.45% UPF kcal/group kcal)   | 102/117                         | 1.19 (0.79-1.79)<br>0.390                   | 38/63                           | 0.90 (0.50-1.61)<br>0.726               | 64/54                           | 1.53 (0.86-2.73)<br>0.147               |
| 3 <sup>rd</sup> tertile (≥8.46% UPF kcal/group kcal)       | 97/104                          | 1.23 (0.80-1.87)<br>0.332                   | 36/56                           | 1.05 (0.57-1.95)<br>0.864               | 61/48                           | 1.39 (0.77-2.52)<br>0.270               |

UPF intake was categorized as tertiles of the proportional caloric intake of UPFs from total caloric intake within each food group. The 3<sup>rd</sup> and 2<sup>nd</sup> tertiles were compared to the 1<sup>st</sup> tertile. ORs are adjusted for age, gender, BMI, total kcal, aspirin, use, and indication for colonoscopy.
